# Supplementary material for: Problems after flight: understanding and comparing Syrians’ perspectives in the Middle East and Europe
Source: BMC Public Health. 2021 Apr 13;21:717. doi: 10.1186/s12889-021-10498-1 (PMC8045311; doi:10.1186/s12889-021-10498-1)
Supplement: Supplementary file 1 — Additional file 1: Table S1. Supplemental examples of problems. [file 12889_2021_10498_MOESM1_ESM.docx]

# Running Head: Syrian refugees’ problems after flight

# Problems After Flight: Understanding and Comparing Syrians’ Perspectives in the Middle East and Europe

Andrea Drescher1,2, Nikolai Kiselev1, Aemal Akhtar3,5, Ceren Acarturk4, Richard A. Bryant3, Zeynep Ilkkursun4, Roland von Känel1,2, Kenneth E. Miller6, Monique C. Pfaltz1,2, Matthis Schick1,2, Ulrich Schnyder1, Marit Sijbrandij5, Julia Spaaij1, Naser Morina1,2

and on behalf of the STRENGTHS Consortium

1 Department of Consultation-Liaison Psychiatry and Psychosomatic Medicine, University Hospital Zurich, University of Zurich, Culmannstrasse 8, 8091 Zurich, Switzerland

2Medical Faculty, University of Zurich, Zurich, Switzerland

3School of Psychology, University of New South Wales, Sydney, NSW 2052, Australia

4 Department of Psychology, Koc University, Istanbul, Turkey

5Department of Clinical, Neuro- and Developmental Psychology and WHO Collaborating Centre for Research and Dissemination of Psychological Interventions, Vrije Universiteit Amsterdam, The Netherlands

6 War Child Holland, Hemholtzstraat 61, 1098 LE Amsterdam, The Netherlands

Correspondence:

Naser Morina, PhD, Department of Consultation-Liaison Psychiatry and Psychosomatic Medicine, University Hospital Zurich, University of Zurich, Culmannstrasse 8, CH-8091 Zurich, Switzerland, naser.morina@usz.ch, Tel +41 44 255 52 80

Table 1

Supplemental Examples of problems

| Jordan | Turkey | Switzerland |
| --- | --- | --- |
| Examples of practical problems | | |
| Employment | Employment | Employment |
| *“No job and no money” [J56]* | “Not having salary after leaving job” [T5] | *“It really annoys me, the exploitation by the employers. That they only want some hands to work but don’t offer or pay” [CH7]* |
| *“Lack of job opportunities” [J16]* | *“Leaving Syria, can't find a job”* [T8] | *“Professional future: It hasn’t worked out with the job or the apprenticeship” [CH39]* |
| *“Work / trying to find a job for her son” [J61]* | *“Husband’s work circumstances and the financial issue. The husband is not working” [T33]* | *“I cannot work because I don’t get a good job. I don’t want to work as cleaning lady” [CH5]* |
| Finances | Finances | Finances |
| *“No money” [J39]* | *“No money” [4]* | *“The rent is not cheap” [CH33]* |
| *“Rising prices” [J50]* | *“Lack of money, because my husband has to send money to his family in Syria” [T14]* | *“I am worried because I turn 65 years and I don’t have enough money to live securely” [CH55]* |
| *“No money making me restless” [J43]* | *“There is no aid. I was having before, but they stopped it because my daughter became 18 years old - but I still have small kids” [T46]* | *“Finding a job with a decent salary” [CH38]* |
| Camp-related | Language | Language |
| *”Being in the Al-Azraq camp/want to go back to Za’atari” [J62]* | *“Learning Turkish language” [24]* | *“I have difficulties with Swiss German” [CH40]* |
| *“[…] Financial issues due to being unable to work (Because I stay in the 5th village)” [J38]* | *“The treatment my daughter receives because of the language barrier. I am also not able to explain this to the management” [T11]* | *“I have stress when I go to the gynecologist because I have no interpreter and I have to take my son with me” [CH53]* |
| *“Being at the camp while looking for better living conditions” [J10]* | *“Don’t know Turkish” [T1]* | *“Learning the language” [CH9]* |
| Government regulations | Government regulations | Government regulations |
| *“Visa expires before the end of this month. Duration of the work permit” [J28]* | *“My mother does not have a resident to do surgery” [T24]* | *“I have no passport; I have been here for three years and I still have the residence permit N” [CH50]* |
| *“Getting a working permit for my husband” [J29]* | *“I can't have a resident card till given that I have been in Turkey for 1 year and because of that my kids couldn't go to school” [T45]* | *“I don’t feel secure and here because I have a temporary residency, I have the F permit. My son has also F, he cannot travel out of Switzerland” [CH36]* |
| *“No job and can’t get a work permit” [J3]* | *“Can't get the ID” [T36]* | *“Residency, I still have the N permit” [CH17]* |
| Housing | Housing | Housing |
| *“Being at the camp while looking for better living conditions” [J10]* | *“My family has 14 members. We can't find a house that could fit us” [T12]* | *“I don’t find a house. I have to go back to the asylum centre” [CH57]* |
| *“Obligation to move from caravan and not being able to get the new caravan contract” [J29]* | *“Not being able of finding home” [T39]* | *“It bothers me living in the asylum centre with my family and I have difficulties finding an apartment” [CH13]* |
|  | *“My home is in 1st floor and its uncomfortable” [T40]* | *“I am in Switzerland since 8 months and I don’t have an apartment” [CH4]* |
| Education | Education | Education |
| *“My son Mohammad is illiterate” [J9]* | *“My son's problem at the school […]” [T44]* | *“[…] and not being able to work or study” [CH2]* |
| *“My son didn’t go back to school” [J40]* | *“I can't have a resident card till giving that I have been in Turkey for 1 year and because of that my kids couldn't go to school” [T45]* | *“Finding an apprenticehip” [CH46]* |
|  | *“[…] children education”*  *[T4]* | *“The difficulty of dealing with my children's supervisors in schools” [CH38]* |
| Medical treatment | Medical treatment | Medical treatment |
| *“Worrying about my husband since he’s sick, he suffers from a stroke and he’s not getting the necessary treatment” [J9]* | *“I have a disabled daughter. I can't take her to the doctor because the sessions are far away” [T12]* | *“No good medical treatment” [CH18]* |
| *“Unavailability of a treatment for my son’s disease in addition to some health issues that I suffer from” [J12]* | *“Medecine is very expensive” [T4]* | *“Doctors don't take my issue serious” [CH10]* |
| *“Inability to receive adequate treatment for my health issues and the difficulty to find one” [J48]* | *“I am sick too and need money for my medicine” [T7]* | *“Medical treatment“ [CH16]* |
| Examples of problems related to war/home country | | |
| *“Worried about my siblings because they’re still in Syria; fearing they’d get arrested” [J26]* | *“Being far from my country and my family, I feel I am strange here” [T20]* | *“Bad memories about Syria” [CH24]* |
| *Fear of going back to our house in Syria [J40]* | *“[…] remembering the bad time that we had” [T21]* | *“The situation in northern Syria; the way updates in the last couple of weeks” [CH54]* |
| Examples of psychological problems | | |
| *“Fearing for my child when send him out to run errands for the house because of his extreme vision deficit” [J18]* | *“Difficulties to understand and deal with my kids, I blame myself because I treated them harshly but I don't know why. Maybe because of the fear that I have and the effect of the war” [T46]* | *“I am worried about my future in Switzerland especially because I am old (35y) and therefore, I am depressed. Sometimes, I loose my hope in life” [CH43]* |
| *“Mental health struggle due to circumstances” [J47]* | *“I am sad because my husband is stressed” [T41]* | *“No self-confidence” [CH14]* |
| *“I get mad at my son when he fights with the neighboring kids” [J21]* | *“I feel very upset because there is no one who understands me and I feel lonely” [T42]* | *“I am not a positive person and I am sometimes pessimistic even though I will finish my studies after the next semester and can find a good job” [CH40]* |
| Examples of social problems | | |
| Interpersonal Problems | | |
| *“One of the relatives hurts me and he’s a close one” [J13]* | *“The way that the Turkish society is dealing with me and with my kids in school” [T17]* | *“The divorce and when my ex-wife requests for the children after she has officially left them with me” [CH31]* |
| *“My problem with my husband is that he wants to go to Syria but I don’t want to because his family causes me headaches” [J55]* | *“I feel that people are trying to avoid me” [T32]* | *“The relationship with the refugees and my family” [CH15]* |
| Separation from family members | | |
| *“Missing my siblings and my children who aren’t in the camp” [J3]* | *“Being far from my country and my family[…]” [T20]* | *“Without my family” [CH44]* |
| *“Being separated from my family” [J11]* | *“My husband got married to another woman and then he travelled to Ethiopia for work, which makes me ask for divorce” [T35]* | *“Being far from my children who are currently in Lebanon, Syria and Netherlands, especially my daughter in Lebanon” [CH23]* |
| Family related problems | | |
| *“Not being able to provide comfort for them [children] and the inability to do so and take decent decisions bothers me and makes me feel sick of all the responsibility” [J48]* | *“Difficulty in controlling children” [T40]* | *“[…] Stress of familial responsibilities especially that I am the breadwinner working to better our conditions (education, work, finding a new house)” [CH49]* |
| *“Dealing with my children issues especially the ones that need my husband’s input” [J4]* | *“I can't learn Turkish because I have many responsibilities, house and kids” [T20]* | *“The divorce and when my ex-wife claims for the children after she has legally left them with me”*  *[CH31]* |
| Examples of physical and psychosomatic problems | | |
| *“My daughter is very sick and I can’t get to her” [J55]* | *“I am sick too and need money for my medicine” [T7]* | *“Headache” [CH8]* |
| *“Unavailability of a treatment for my son’s disease in addition to some health issues that I suffer from” [J12]* | *“My father was dead and two of my brothers are disabled and my wife is ill” [T25]* | *“My husband is sick” [CH47]* |
